# Supplementary material for: The Effect of Meteorological, Pollution, and Geographic Exposures on Death by Suicide: A Scoping Review
Source: MDPI journal article supplement (doi:10.3390/ijerph18157809), 2021-07-23
Supplement: s1 [file s1]

### Citations of Studies Included in This Scoping Review

- Ajdacic-Gross, V., Lauber, C., Sansossio, R., Bopp, M., Eich, D., Gostynski, M., Rossler, W. (2007). Seasonal associations between weather conditions and suicide—Evidence against a classic hypothesis. *American Journal of Epidemiology*, 165(5), 561–569.
- Asirdizer, M., Kartal, E., Etli, Y., Tatlisumak, E., Gumus, O., Hekimoglu, Y., & Keskin, S. (2018). The effect of altitude and climate on the suicide rates in Turkey. *J Forensic Leg Med*, 54, 91–95.
- Astudillo-García, C. I., Rodríguez-Villamizar, L. A., Cortez-Lugo, M., Cruz-De la Cruz, J. C., & Fernández-Niño, J. A. (2019). Air Pollution and Suicide in Mexico City: A Time Series Analysis, 2000–2016. *Int J Environ Res Public Health*, 16(16), 2971.
- Bakian, A. V., Huber, R. S., Coon, H., Gray, D., Wilson, P., McMahon, W. M., & Renshaw, P. F. (2015). Acute air pollution exposure and risk of suicide completion. *Am J Epidemiol*, 181(5), 295–303.
- Bando, D. H., Teng, C. T., Volpe, F. M., Masi, E., Pereira, L. A., & Braga, A. L. (2017). Suicide and meteorological factors in São Paulo, Brazil, 1996–2011: a time series analysis. *Braz J Psychiatry*, 39(3), 220–227.
- Beard, J. D., Umbach, D. M., Hoppin, J. A., Richards, M., Alavanja, M. C., Blair, A., Kamel, F. (2011). Suicide and pesticide use among pesticide applicators and their spouses in the agricultural health study. *Environ Health Perspect*, 119(11), 1610–1615.
- Betz, M. E., Valley, M. A., Lowenstein, S. R., Hedegaard, H., Thomas, D., Stallones, L., & Honigman, B. (2011). Elevated suicide rates at high altitude: sociodemographic and health issues may be to blame. *Suicide Life Threat Behav*, 41(5), 562–573.
- Biermann, T., Stilianakis, N., Bleich, S., Thürauf, N., Kornhuber, J., & Reulbach, U. (2009). The hypothesis of an impact of ozone on the occurrence of completed and attempted suicides. *Med Hypotheses*, 72(3), 338–341.
- Bozsonyi, K., Lester, D., Fulop, A., Zonda, T., & Balint, L. (2020). The effects of sunshine duration and ambient temperature on suicides in Hungary. *Neuropsychopharmacol Hung*, 22(1), 23–28.
- Brenner, B., Cheng, D., Clark, S., & Camargo, C. A., Jr. (2011). Positive association between altitude and suicide in 2584 U.S. counties. *High Alt Med Biol*, 12(1), 31–35.
- Carleton, T. A. (2017). Crop-damaging temperatures increase suicide rates in India. *Proc Natl Acad Sci U S A*, 114(33), 8746–8751.
- Casas, L., Cox, B., Bauwelinck, M., Nemery, B., Deboosere, P., & Nawrot, T. S. (2017). Does air pollution trigger suicide? A case-crossover analysis of suicide deaths over the life span. *Eur J Epidemiol*, 32(11), 973–981.
- Chau, P. H., Yip, P. S. F., Lau, H. Y. E., Ip, Y. T., Law, F. Y. W., Ho, R. T. H., Woo, J. (2020). Hot Weather and Suicide Deaths among Older Adults in Hong Kong, 1976–2014: A Retrospective Study. *Int J Environ Res Public Health*, 17(10).
- Díaz, J., López-Bueno, J. A., López-Ossorio, J. J., González, J. L., Sánchez, F., & Linares, C. (2020). Short-term effects of traffic noise on suicides and emergency hospital admissions due to anxiety and depression in Madrid (Spain). *Sci Total Environ*, 710, 136315.
- Dixon, P. G., & Kalkstein, A. J. (2018). Where are weather-suicide associations valid? An examination of nine US counties with varying seasonality. *Int J Biometeorol*, 62(5), 685–697.
- Dixon, P. G., McDonald, A. N., Scheitlin, K. N., Stapleton, J. E., Allen, J. S., Carter, W. M., Roberts, J. B. (2007). Effects of temperature variation on suicide in five U.S. counties, 1991–2001. *Int J Biometeorol*, 51(5), 395–403.
- Dixon, P. G., Sinyor, M., Schaffer, A., Levitt, A., Haney, C. R., Ellis, K. N., & Sheridan, S. C. (2014). Association of weekly suicide rates with temperature anomalies in two different climate types. *Int J Environ Res Public Health*, 11(11), 11627–11644.
- Faria, N. M., Fassa, A. G., & Meucci, R. D. (2014). Association between pesticide exposure and suicide rates in Brazil. *Neurotoxicology*, 45, 355–362.
- Fernández-Arteaga, V., Tovilla-Zárate, C. A., Fresán, A., González-Castro, T. B., Juárez-Rojop, I. E., López-Narváez, L., & Hernández-Díaz, Y. (2016). Association between completed suicide and environmental temperature in a Mexican population, using the Knowledge Discovery in Database approach. *Comput Methods Programs Biomed*, 135, 219–224.

Fernández-Niño, J. A., Astudillo-García, C. I., Rodríguez-Villamizar, L. A., & Florez-Garcia, V. A. (2018). Association between air pollution and suicide: a time series analysis in four Colombian cities. *Environ Health*, 17(1), 47.

Fernández-Niño, J. A., Flórez-García, V. A., Astudillo-García, C. I., & Rodríguez-Villamizar, L. A. (2018). Weather and Suicide: A Decade Analysis in the Five Largest Capital Cities of Colombia. *Int J Environ Res Public Health*, 15(7), 1313.

Figgs, L. W., Holsinger, H., Freitas, S. J., Brion, G. M., Hornung, R. W., Rice, C. H., & Tollerud, D. (2011). Increased suicide risk among workers following toxic metal exposure at the Paducah gaseous diffusion plant from 1952 to 2003: a cohort study. *Int J Occup Environ Med*, 2(4), 199–214.

Grijibovski, A. M., Kozhakhmetova, G., Kosbayeva, A., & Menne, B. (2013). Associations between air temperature and daily suicide counts in Astana, Kazakhstan. *Medicina (Kaunas)*, 49(8), 379–385.

Ha, H., & Tu, W. (2018). An Ecological Study on the Spatially Varying Relationship between County-Level Suicide Rates and Altitude in the United States. *Int J Environ Res Public Health*, 15(4), 671.

Haws, C. A., Gray, D. D., Yurgelun-Todd, D. A., Moskos, M., Meyer, L. J., & Renshaw, P. F. (2009). The possible effect of altitude on regional variation in suicide rates. *Med Hypotheses*, 73(4), 587–590.

Helama, S., Holopainen, J., & Partonen, T. (2013). Temperature-associated suicide mortality: contrasting roles of climatic warming and the suicide prevention program in Finland. *Environ Health Prev Med*, 18(5), 349–355.

Hernández, O. H., Hernández-Sánchez, J. A., & Flores-Gutiérrez, J. D. (2018). Annual fluctuations of sunlight and suicides in a region South of the Tropic of Cancer. *Biological Rhythm Research*, 49(3), 405–411. Retrieved from <http://search.ebscohost.com/login.aspx?direct=true&AuthType=ip,athens&db=psyh&AN=2018-15420-005&site=ehost-live> ORCID: 0000-0002-7269-5716 ohhernan@uacam.mx

Hiltunen, L., Haukka, J., Ruuhela, R., Suominen, K., & Partonen, T. (2014). Local daily temperatures, thermal seasons, and suicide rates in Finland from 1974 to 2010. *Environ Health Prev Med*, 19(4), 286–294.

Holopainen, J., Helama, S., Björkenstam, C., & Partonen, T. (2013). Variation and seasonal patterns of suicide mortality in Finland and Sweden since the 1750s. *Environ Health Prev Med*, 18(6), 494–501.

Holopainen, J., Helama, S., & Partonen, T. (2014). Does diurnal temperature range influence seasonal suicide mortality? Assessment of daily data of the Helsinki metropolitan area from 1973 to 2010. *Int J Biometeorol*, 58(6), 1039–1045.

Huber, R. S., Coon, H., Kim, N., Renshaw, P. F., & Kondo, D. G. (2014). Altitude is a risk factor for completed suicide in bipolar disorder. *Med Hypotheses*, 82(3), 377–381.

Inoue, K., Nishimura, Y., Fujita, Y., Ono, Y., & Fukunaga, T. (2012). The relationship between suicide and five climate issues in a large-scale and long-term study in Japan. *West Indian Med J*, 61(5), 532–537.

Kim, C., Jung, S. H., Kang, D. R., Kim, H. C., Moon, K. T., Hur, N. W., Suh, I. (2010). Ambient particulate matter as a risk factor for suicide. *Am J Psychiatry*, 167(9), 1100–1107.

Kim, J., Choi, N., Lee, Y. J., An, H., Kim, N., Yoon, H. K., & Lee, H. J. (2014). High altitude remains associated with elevated suicide rates after adjusting for socioeconomic status: a study from South Korea. *Psychiatry Investig*, 11(4), 492–494.

Kim, N., Mickelson, J. B., Brenner, B. E., Haws, C. A., Yurgelun-Todd, D. A., & Renshaw, P. F. (2011). Altitude, gun ownership, rural areas, and suicide. *Am J Psychiatry*, 168(1), 49–54.

Kim, Y., Kim, H., Gasparrini, A., Armstrong, B., Honda, Y., Chung, Y., Hashizume, M. (2019). Suicide and Ambient Temperature: A Multi-Country Multi-City Study. *Environ Health Perspect*, 127(11), 117007.

Kim, Y., Kim, H., Honda, Y., Guo, Y. L., Chen, B. Y., Woo, J. M., & Ebi, K. L. (2016). Suicide and Ambient Temperature in East Asian Countries: A Time-Stratified Case-Crossover Analysis. *Environ Health Perspect*, 124(1), 75–80.

Kim, Y., Kim, H., & Kim, D.-S. (2011). Association between daily environmental temperature and suicide mortality in Korea (2001–2005). *Psychiatry Research*, 186(2), 390–396.

- Kim, Y., Myung, W., Won, H. H., Shim, S., Jeon, H. J., Choi, J., Kim, D. K. (2015). Association between air pollution and suicide in South Korea: a nationwide study. *PLoS One*, 10(2), e0117929.
- Kim, Y., Ng, C. F. S., Chung, Y., Kim, H., Honda, Y., Guo, Y. L., Hashizume, M. (2018). Air Pollution and Suicide in 10 Cities in Northeast Asia: A Time-Stratified Case-Crossover Analysis. *Environ Health Perspect*, 126(3), 037002.
- Lambert, G., Reid, C., Kaye, D., Jennings, G., & Esler, M. (2003). Increased suicide rate in the middle-aged and its association with hours of sunlight. *Am J Psychiatry*, 160(4), 793–795.
- Lee, H., Myung, W., Kim, S. E., Kim, D. K., & Kim, H. (2018). Ambient air pollution and completed suicide in 26 South Korean cities: Effect modification by demographic and socioeconomic factors. *Sci Total Environ*, 639, 944–951.
- Lee, H. C., Lin, H. C., Tsai, S. Y., Li, C. Y., Chen, C. C., & Huang, C. C. (2006). Suicide rates and the association with climate: a population-based study. *J Affect Disord*, 92(2), 221–226.
- Lester, D. (1986). Suicide and homicide rates: their relationship to latitude and longitude and to the weather. *Suicide Life Threat Behav*, 16(3), 356–359.
- Lin, G. Z., Li, L., Song, Y. F., Zhou, Y. X., Shen, S. Q., & Ou, C. Q. (2016). The impact of ambient air pollution on suicide mortality: a case-crossover study in Guangzhou, China. *Environ Health*, 15(1), 90.
- Likhvar, V., Honda, Y., & Ono, M. (2011). Relation between temperature and suicide mortality in Japan in the presence of other confounding factors using time-series analysis with a semiparametric approach. *Environ Health Prev Med*, 16(1), 36–43.
- Luan, G., Yin, P., Wang, L., & Zhou, M. (2019). Associations between ambient high temperatures and suicide mortality: a multi-city time-series study in China. *Environ Sci Pollut Res Int*, 26(20), 20377–20385.
- MacFarlane, E., Simpson, P., Benke, G., & Sim, M. R. (2011). Suicide in Australian pesticide-exposed workers. *Occup Med (Lond)*, 61(4), 259–264.
- Maes, M., De Meyer, F., Thompson, P., Peeters, D., & Cosyns, P. (1994). Synchronized annual rhythms in violent suicide rate, ambient temperature and the light-dark span. *Acta Psychiatr Scand*, 90(5), 391–396.
- Makris, G. D., Reutfors, J., Larsson, R., Isacson, G., Ösby, U., Ekblom, A., Papadopoulos, F. C. (2016). Serotonergic medication enhances the association between suicide and sunshine. *J Affect Disord*, 189, 276–281.
- Marion, S. A., Agbayewa, M. O., & Wiggins, S. (1999). The effect of season and weather on suicide rates in the elderly in British Columbia. *Can J Public Health*, 90(6), 418–422.
- Meyer, A., Koifman, S., Koifman, R. J., Moreira, J. C., de Rezende Chrisman, J., & Abreu-Villaca, Y. (2010). Mood disorders hospitalizations, suicide attempts, and suicide mortality among agricultural workers and residents in an area with intensive use of pesticides in Brazil. *J Toxicol Environ Health A*, 73(13), 866–877.
- Min, J. Y., Kim, H. J., & Min, K. B. (2018). Long-term exposure to air pollution and the risk of suicide death: A population-based cohort study. *Sci Total Environ*, 628–629, 573–579.
- Min, J. Y., & Min, K. B. (2018). Night noise exposure and risk of death by suicide in adults living in metropolitan areas. *Depress Anxiety*, 35(9), 876–883.
- Nejar, K. A., Benseñor, I. M., & Lotufo, P. A. (2007). Sunshine and suicide at the tropic of Capricorn, São Paulo, Brazil, 1996-2004. *Rev Saude Publica*, 41(6), 1062-1064.
- Ng, C. F., Stickley, A., Konishi, S., & Watanabe, C. (2016). Ambient air pollution and suicide in Tokyo, 2001–2011. *J Affect Disord*, 201, 194–202.
- Oka, M., Kubota, T., Tsubaki, H., & Yamauchi, K. (2015). Analysis of impact of geographic characteristics on suicide rate and visualization of result with Geographic Information System. *Psychiatry Clin Neurosci*, 69(6), 375–382.
- Page, L. A., Hajat, S., & Kovats, R. S. (2007). Relationship between daily suicide counts and temperature in England and Wales. *Br J Psychiatry*, 191, 106–112.
- Papadopoulos, F. C., Frangakis, C. E., Skalkidou, A., Petridou, E., Stevens, R. G., & Trichopoulos, D. (2005). Exploring lag and duration effect of sunshine in triggering suicide. *J Affect Disord*, 88(3), 287–297.

- Petridou, E., Papadopoulos, F. C., Frangakis, C. E., Skalkidou, A., & Trichopoulos, D. (2002). A role of sunshine in the triggering of suicide. *Epidemiology*, 13(1), 106–109.
- Pickett, W., King, W. D., Lees, R. E., Bienefeld, M., Morrison, H. I., & Brison, R. J. (1998). Suicide mortality and pesticide use among Canadian farmers. *Am J Ind Med*, 34(4), 364–372.
- Preti, A. (1998). The influence of climate on suicidal behaviour in Italy. *Psychiatry Res*, 78(1), 9–19.
- Qi, X., Hu, W., Mengersen, K., & Tong, S. (2014). Socio-environmental drivers and suicide in Australia: Bayesian spatial analysis. *BMC Public Health*, 14, 681.
- Riblet, N. B., Gottlieb, D. J., Watts, B. V., Cornelius, S. L., Fan, V. S., Shi, X., & Shiner, B. (2019). Hypoxia-related risk factors for death by suicide in a national clinical sample. *Psychiatry Res*, 273, 247–251.
- Ruuhela, R., Hiltunen, L., Venäläinen, A., Pirinen, P., & Partonen, T. (2009). Climate impact on suicide rates in Finland from 1971 to 2003. *Int J Biometeorol*, 53(2), 167–175.
- Sabic, H., Kious, B., Boxer, D., Fitzgerald, C., Riley, C., Scholl, L., Kondo, D. G. (2019). Effect of Altitude on Veteran Suicide Rates. *High Alt Med Biol*, 20(2), 171–177.
- Salib, E., & Gray, N. (1997). Weather conditions and fatal self-harm in North Cheshire 1989–1993. *Br J Psychiatry*, 171, 473–477.
- Santurtún, M., Sanchez-Lorenzo, A., Del Real, Á., Zarrabeitia, M. T., & Santurtún, A. (2018). Association Between Suicide and Environmental Variables in the North of Spain: A 14-Year Analysis. *Cult Med Psychiatry*, 42(3), 647–653.
- Schneider, A., Hampel, R., Ladwig, K. H., Baumert, J., Lukaschek, K., Peters, A., & Breitner, S. (2020). Impact of meteorological parameters on suicide mortality rates: A case-crossover analysis in Southern Germany (1990–2006). *Sci Total Environ*, 707, 136053.
- Selek, S. (2013). Altitude, immigration and suicide rates: a study from Turkey. *Psychiatry Investig*, 10(1), 89–91.
- Seregi, B., Kapitány, B., Maróti-Agóts, Á., Rihmer, Z., Gonda, X., & Döme, P. (2017). Weak associations between the daily number of suicide cases and amount of daily sunlight. *Prog Neuropsychopharmacol Biol Psychiatry*, 73, 41–48.
- Sim, K., Kim, Y., Hashizume, M., Gasparrini, A., Armstrong, B., Sera, F., Chung, Y. (2020). Nonlinear temperature-suicide association in Japan from 1972 to 2015: Its heterogeneity and the role of climate, demographic, and socioeconomic factors. *Environ Int*, 142, 105829.
- Stallones, L. (2006). Suicide and potential occupational exposure to pesticides, Colorado 1990–1999. *J Agromedicine*, 11(3), 107–112.
- Tietjen, G. H., & Kripke, D. F. (1994). Suicides in California (1968–1977): absence of seasonality in Los Angeles and Sacramento counties. *Psychiatry Res*, 53(2), 161–172.
- Tsai, J. F., & Cho, W. (2012). Temperature change dominates the suicidal seasonality in Taiwan: a time-series analysis. *J Affect Disord*, 136(3), 412–418.
- van Wijngaarden, E. (2003). An exploratory investigation of suicide and occupational exposure. *J Occup Environ Med*, 45(1), 96–101.
- van Wijngaarden, E., & Savitz, D. A. (2000). Occupational sunlight exposure in relation to suicide among electric utility workers. *Am J Ind Med*, 38(2), 149–154.
- Vyssoki, B., Kapusta, N. D., Prashak-Rieder, N., Dorffner, G., & Willeit, M. (2014). Direct effect of sunshine on suicide. *JAMA Psychiatry*, 71(11), 1231–1237.
- Vyssoki, B., Prashak-Rieder, N., Sonneck, G., Blüml, V., Willeit, M., Kasper, S., & Kapusta, N. D. (2012). Effects of sunshine on suicide rates. *Compr Psychiatry*, 53(5), 535–539.
- Yan, Y. Y. (2000). Geophysical variables and behavior: LXXXIX. The influence of weather on suicide in Hong Kong. *Percept Mot Skills*, 91(2), 571–577.
- Yang, C. Y., Weng, Y. H., & Chiu, Y. W. (2019). Relationship between ozone air pollution and daily suicide mortality: a time-stratified case-crossover study in Taipei. *J Toxicol Environ Health A*, 82(4), 261–267.
